# Supplementary material for: Is ibogaine treatment durable? 12-month follow-up of magnesium–ibogaine therapy (MISTIC) in Special Operations Veterans with traumatic brain injuries
Source: Research Square preprint supplement (doi:10.21203/rs.3.rs-6909189/v1), 2025-12-17
Supplement: Supplementary file 1 [file 63167b3caff006f1e41a42c1.pdf]

## Supplementary Information

Faerman A, Lissemore JI, Geoly A, et al; Is ibogaine treatment durable? 12-month follow-up of magnesium–ibogaine therapy (MISTIC) in Special Operations Veterans with traumatic brain injuries.

### **Kaplan-Meier Survival Analysis of Duration of Remission**

Kaplan-Meier survival estimates were derived using the *survfit* function from the survival package in R (4.3.2). Of note, Kaplan-Meier survival analyses typically report median survival times with corresponding 95% confidence intervals for upper and lower bounds. The median survival time is defined as the length of time in which half of the patients develop clinical events. Modest to low survival rates (less than 50%), minimal censoring, large sample sizes, and sufficient follow-up are required for survival to be estimated at less than 50%. Otherwise, the median survival time and corresponding 95% confidence intervals cannot be determined reliably. In such cases, the restricted mean survival time (RMST) and its standard error may be reported instead, as was done presently. Survival curves, cumulative risk, and censor tables were then visualized using the *ggsurvplot* function in R.

Survival curves for MDD, Anxiety, and PTSD were compared statistically using a log-rank test with the *survdif* function to evaluate any differences in relapse across each diagnostic dimension, with significance defined as  $p < 0.05$ . Where significant differences (if any) were detected, follow-up pairwise log-rank comparisons using the *pairwise\_survdif* function were performed using FDR correction for multiple comparisons.

### **Kaplan-Meier Survival Analysis of Duration of Response**

Kaplan-Meier survival analysis was also performed for participants who met MINI diagnostic criteria at baseline and also met response criteria immediately post-MISTIC for PTSD ( $n=22$ ), depression ( $n=15$ ), and anxiety ( $n=13$ ), respectively. The duration of response was also explored in all participants who met response criteria immediately post-MISTIC for PTSD ( $n=28$ ), depression ( $n=29$ ), and anxiety ( $n=28$ ), respectively. Relapse was defined as the first recorded departure from response criteria for a respective symptom (PTSD: CAPS-5 reduction  $\geq 10$  points; depression: MADRS reduction  $\geq 50\%$ ; anxiety: HAM-A reduction  $\geq 50\%$ ). Cases that were lost to follow-up or never experienced a risk event were censored at their last recorded observation.

### **Cox Regression Analysis**

Additional exploratory analyses of pretreatment predictors of relapse were performed using separate univariate Cox regression models using the R *coxph* function, examining hazard ratios (HR) for age, CES, baseline symptom severity (CAPS-5, MADRS, HAM-A), and number of TBIs, respectively. If significant ( $p < 0.05$ ) univariate predictors were found, a follow-up multivariate analysis was performed to explore joint contributions to relapse for each diagnosis.

### **Baseline Correlates of Long-Term Clinical Score Trajectories**

Exploratory correlations were also performed to investigate whether baseline characteristics were related to long-term clinical score trajectories after ibogaine treatment. The long-term variability of clinical scores was quantified by first fitting a linear model of clinical change from immediately post-MISTIC to the 12-month follow-up (for WHODAS, CAPS-5, MADRS, and HAM-A separately), then calculating average model residuals for each participant (i.e., the difference between observed values and values predicted by the model). Positive residuals, therefore, reflect poorer, less stable outcomes over time, and zero or negative residuals reflect more favorable outcomes. Spearman's correlations were performed between baseline characteristics (age, CES, and baseline symptom severity) and model residuals for each outcome measure. FDR correction was applied to correct for multiple comparisons.

### **RESULTS**

**Table S1. Additional interventions pursued during long-term follow-up.** Of the 27 participants with long-term follow-up data, subgroups of interest were defined based on types of interventions pursued at any point during the 12-month follow-up period. Percentage improvement from baseline to last follow-up is reported for participants who *did not* pursue each intervention. When sample size permitted, percentage change from baseline to last recorded follow-up was compared between participants who did vs. did not pursue the intervention (p-values shown for two-tailed non-parametric Mann-Whitney tests). Of note, these subgroups are not sensitive to the modality, duration, and consistency of the treatments provided, and instead reflect whether participants sought different forms of treatment. Given the small sample sizes in these subgroup analyses, results should be interpreted with caution.

| <b>Intervention pursued</b>         | <b>n pursued</b> | <b>n not pursued</b> | <b>% improvement (Mean <math>\pm</math> SD, <i>did not pursue</i>)</b>              | <b>Mann-Whitney test (p-value: pursued vs. not pursued)</b> |
|-------------------------------------|------------------|----------------------|-------------------------------------------------------------------------------------|-------------------------------------------------------------|
| Structured mental health treatment* | 12               | 15                   | WHODAS: 79 $\pm$ 17<br>CAPS: 90 $\pm$ 10<br>MADRS: 81 $\pm$ 16<br>HAMA: 80 $\pm$ 14 | WHODAS: 0.64<br>CAPS: 0.51<br>MADRS: 0.77<br>HAMA: 0.73     |
| Psychotropic medication             | 3                | 24                   | WHODAS: 81 $\pm$ 17<br>CAPS: 90 $\pm$ 11<br>MADRS: 85 $\pm$ 15<br>HAMA: 84 $\pm$ 13 | N/A                                                         |
| <b>Psychedelics</b>                 |                  |                      |                                                                                     |                                                             |
| 5-MeO-DMT**                         | 19               | 8                    | WHODAS: 81 $\pm$ 20<br>CAPS: 77 $\pm$ 24<br>MADRS: 74 $\pm$ 23<br>HAMA: 70 $\pm$ 27 | WHODAS: 0.51<br>CAPS: 0.17<br>MADRS: 0.23<br>HAMA: 0.12     |

|               |    |    |                                                                     |                                                         |
|---------------|----|----|---------------------------------------------------------------------|---------------------------------------------------------|
| Psilocybin*** | 15 | 12 | WHODAS: 83 ± 15<br>CAPS: 87 ± 20<br>MADRS: 82 ± 21<br>HAMA: 79 ± 25 | WHODAS: 0.23<br>CAPS: 0.45<br>MADRS: 0.34<br>HAMA: 0.61 |
| Ibogaine***   | 5  | 22 | WHODAS: 75 ± 26<br>CAPS: 86 ± 19<br>MADRS: 84 ± 17<br>HAMA: 79 ± 24 | N/A                                                     |
| Ayahuasca     | 1  | 26 | WHODAS: 75 ± 24<br>CAPS: 86 ± 18<br>MADRS: 82 ± 18<br>HAMA: 78 ± 23 | N/A                                                     |

\* Includes any type of therapy or counselling with a health professional. Does not include mindfulness, coaching, AA, and self-help.

\*\* Ambio Life Sciences offers a 5-MeO-DMT treatment session after ibogaine treatment as part of their usual services (offered after the 1-month follow-up for study participants).

\*\*\* Includes reports of microdosing.

**Table S2. Sensitivity analyses excluding participants who did not meet diagnostic criteria for PTSD, depression, or anxiety disorder at baseline.** Linear mixed-effects model results show long-term improvements in PTSD, depression, and anxiety after MISTIC in participants who met diagnostic criteria. Only 12-month primary outcomes are shown due to small sample sizes at 3, 6, and 9 months in subgroups.

|              |                        | Baseline    | 12 Months |
|--------------|------------------------|-------------|-----------|
| <b>CAPS</b>  | N                      | 23          | 19        |
|              | M (SD)                 | 35.7 (11.0) | 5.1 (7.7) |
|              | <i>F</i>               | -           | 322.82    |
|              | <i>p<sub>FDR</sub></i> | -           | <.001     |
|              | <i>d</i>               | -           | 3.04      |
| <b>MADRS</b> | N                      | 15          | 11        |
|              | M (SD)                 | 31.3 (6.5)  | 8.5 (6.6) |
|              | <i>F</i>               | -           | 183.01    |
|              | <i>p<sub>FDR</sub></i> | -           | <.001     |
|              | <i>d</i>               | -           | 3.58      |
| <b>HAMA</b>  | N                      | 14          | 12        |
|              | M (SD)                 | 23.8 (7.6)  | 3.9 (4.1) |
|              | <i>F</i>               | -           | 123.50    |
|              | <i>p<sub>FDR</sub></i> | -           | <.001     |
|              | <i>d</i>               | -           | 2.16      |

Results are presented as raw mean (M) and standard deviation (SD). Degrees of freedom: (1, 117) for CAPS-5, (1, 72) for MADRS, and (1,71) for HAM-A. Cohen's *d* reflects the effect size for the contrast between 12 months post-treatment and baseline. *Abbreviations:* CAPS-5 = Clinician Administered PTSD Scale for DSM-5; MADRS = Montgomery–Åsberg Depression Rating Scale; HAM-A = Hamilton Anxiety Rating Scale.

**Table S3. Sensitivity analyses including only participants with a history of mild TBI.**

Linear mixed-effects model results demonstrate sustained improvements in functional disability (WHODAS-2.0), PTSD (CAPS-5), depression (MADRS), and anxiety (HAM-A) after ibogaine treatment.

|               |                        | <b>Baseline</b> | <b>3 Months</b> | <b>6 Months</b> | <b>9 Months</b> | <b>12 Months</b> |
|---------------|------------------------|-----------------|-----------------|-----------------|-----------------|------------------|
| <b>WHODAS</b> | N                      | 28              | 7               | 15              | 14              | 24               |
|               | M (SD)                 | 30.2 (14.8)     | 5.2 (6.3)       | 8.3 (8.7)       | 7.8 (7.2)       | 8.7 (12.5)       |
|               | <i>F</i>               | -               | 47.61           | 63.67           | 60.82           | 95.25            |
|               | <i>p<sub>FDR</sub></i> | -               | <.001           | <.001           | <.001           | <.001            |
|               | <i>d</i>               | -               | 2.41            | 1.96            | 1.79            | 2.25             |
| <b>CAPS</b>   | N                      | 28              | 9               | 19              | 16              | 24               |
|               | M (SD)                 | 31.7 (13.0)     | 3.2 (2.5)       | 4.8 (5.8)       | 4.6 (5.4)       | 4.5 (7.0)        |
|               | <i>F</i>               | -               | 155.76          | 227.06          | 222.62          | 279.97           |
|               | <i>p<sub>FDR</sub></i> | -               | <.001           | <.001           | <.001           | <.001            |
|               | <i>d</i>               | -               | 3.28            | 2.22            | 2.86            | 2.66             |
| <b>MADRS</b>  | N                      | 28              | 9               | 19              | 16              | 24               |
|               | M (SD)                 | 25.2 (8.7)      | 2.0 (2.7)       | 4.5 (5.3)       | 4.3 (4.1)       | 5.0 (5.6)        |
|               | <i>F</i>               | -               | 188.11          | 247.38          | 240.86          | 274.87           |
|               | <i>p<sub>FDR</sub></i> | -               | <.001           | <.001           | <.001           | <.001            |
|               | <i>d</i>               | -               | 4.21            | 2.88            | 3.94            | 3.29             |
| <b>HAMA</b>   | N                      | 28              | 9               | 19              | 16              | 24               |
|               | M (SD)                 | 20.7 (8.6)      | 3.8 (2.7)       | 3.5 (3.1)       | 4.7 (4.6)       | 3.8 (3.7)        |
|               | <i>F</i>               | -               | 107.59          | 185.10          | 150.01          | 207.14           |
|               | <i>p<sub>FDR</sub></i> | -               | <.001           | <.001           | <.001           | <.001            |
|               | <i>d</i>               | -               | 2.58            | 2.30            | 2.05            | 2.16             |

Results are presented as raw mean (M) and standard deviation (SD). Degrees of freedom: (1, 130) for WHODAS; (1, 142) for CAPS-5, MADRS, and HAM-A. Cohen's *d* reflects the effect size for the contrast between each post-treatment time point and baseline.

*Abbreviations:* CAPS-5 = Clinician Administered PTSD Scale for DSM-5; HAM-A = Hamilton Anxiety Rating Scale; MADRS = Montgomery–Åsberg Depression Rating Scale; WHODAS-2.0 = World Health Organization Disability Assessment Schedule, 2<sup>nd</sup> Edition

**Table S4.** Kaplan-Meier sustained remission (non-relapse) estimates (with 95% confidence intervals) for PTSD (n=19), depression (n=11), and anxiety (n=11) diagnoses over time following MISTIC for participants meeting MINI diagnostic criteria at baseline.

| Diagnosis  | 1-Month        | 3-Month        | 6-Month        | 9-Month        | 12-Month       |
|------------|----------------|----------------|----------------|----------------|----------------|
| PTSD       | 89% (77, 100%) | 89% (77, 100%) | 89% (77, 100%) | 84% (68, 100%) | 84% (68, 100%) |
| Depression | 91% (75, 100%) | 91% (75, 100%) | 80% (58, 100%) | 80% (58, 100%) | 66% (41, 100%) |
| Anxiety    | 82% (62, 100%) | 82% (62, 100%) | 72% (49, 100%) | 61% (38, 100%) | 61% (38, 100%) |

**Table S5.** Kaplan-Meier sustained response (non-relapse) estimates (and 95% confidence intervals) for PTSD (n=22), depression (n=15), and anxiety (n=13) diagnoses over time following MISTIC for participants meeting MINI diagnostic criteria at baseline.

| Diagnosis  | 1-Month          | 3-Month          | 6-Month          | 9-Month          | 12-Month         |
|------------|------------------|------------------|------------------|------------------|------------------|
| PTSD       | 100% (100, 100%) | 100% (100, 100%) | 100% (100, 100%) | 100% (100, 100%) | 100% (100, 100%) |
| Depression | 93% (82, 100%)   | 93% (82, 100%)   | 86% (69, 100%)   | 86% (69, 100%)   | 86% (69, 100%)   |
| Anxiety    | 85% (67, 100%)   | 85% (67, 100%)   | 76% (56, 100%)   | 68% (46, 100%)   | 68% (46, 100%)   |

**Table S6.** Kaplan-Meier sustained response (non-relapse) estimates (and 95% confidence intervals) for PTSD (n=28), depression (n=29), and anxiety (n=28) diagnoses over time following MISTIC for all participants.

| Diagnosis  | 1-Month          | 3-Month          | 6-Month        | 9-Month        | 12-Month       |
|------------|------------------|------------------|----------------|----------------|----------------|
| PTSD       | 100% (100, 100%) | 100% (100, 100%) | 96% (89, 100%) | 96% (89, 100%) | 96% (89, 100%) |
| Depression | 97% (90, 100%)   | 97% (90, 100%)   | 85% (73, 100%) | 85% (73, 100%) | 85% (73, 100%) |
| Anxiety    | 93% (84, 100%)   | 93% (84, 100%)   | 89% (78, 100%) | 85% (73, 100%) | 85% (73, 100%) |

### ***Kaplan-Meier Survival Analysis of Duration of Response***

In participants who met MINI diagnostic criteria at baseline and response criteria immediately post-MISTIC, Kaplan-Meier survival analysis revealed mean durations of clinical response of 12.0 (SE=0.0), 10.8 (SE=0.8), and 9.5 (SE=1.3) months for PTSD, depression, and anxiety, respectively. A significant difference in survival curves was observed between diagnoses ( $\chi^2 = 7.3$ ,  $df = 2$ ,  $p = 0.027$ ), which was driven largely by the lack of observed relapse events in PTSD. Subsequent pairwise log-rank testing comparing each diagnosis pair revealed no significant differences in survival curves between anxiety and depression ( $\chi^2 = 1.1$ ,  $df = 1$ ,  $p = 0.3$ ,  $pFDR = 0.3$ ) or PTSD and depression ( $\chi^2 = 3.1$ ,  $df = 1$ ,  $p = 0.08$ ,  $pFDR = 0.12$ ). However, there was a significant difference between PTSD and anxiety ( $\chi^2 = 7.6$ ,  $df = 1$ ,  $p = 0.006$ ,  $pFDR = 0.018$ ).

In all participants who met response criteria immediately post-MISTIC, Kaplan-Meier survival analysis revealed mean durations of clinical response of 11.8 (SE=0.2), 11.0 (SE=0.5), and 10.9

(SE=0.6) months for PTSD, depression, and anxiety, respectively. No significant differences in survival curves were found between diagnoses ( $\chi^2 = 2.2$ ,  $df = 2$ ,  $p = 0.34$ ).

### **Baseline Predictors of Relapse**

#### *PTSD*

Univariate Cox regression analysis did not reveal a significant effect of age (HR, 0.84; 95% CI, 0.67-1.07,  $p = 0.2$ ), number of TBIs (HR, 0.95; 95% CI, 0.86-1.06,  $p = 0.4$ ), or baseline CAPS-5 score on the duration of remission (HR, 1.19; 95% CI, 1.00-1.41,  $p = 0.052$ ). However, there was a significant effect of CES on the duration of PTSD remission (HR, 0.81; 95% CI, 0.66-1.00,  $p = 0.044$ ), such that for each one-unit increase in CES, the risk of a PTSD relapse was reduced by 19%.

#### *Depression*

Univariate Cox regression analysis did not reveal a significant effect of age (HR, 0.97; 95% CI, 0.80-1.18,  $p = 0.8$ ), number of TBIs (HR, 0.99; 95% CI, 0.95-1.04,  $p = 0.8$ ), baseline MADRS score (HR, 1.08; 95% CI, 0.90-1.30,  $p = 0.4$ ), or CES on the duration of remission (HR, 0.71; 95% CI, 0.49-1.04,  $p = 0.079$ ).

#### *Anxiety*

Univariate Cox regression analysis did not reveal a significant effect of age (HR, 0.81; 95% CI, 0.63-1.03,  $p = 0.087$ ), number of TBIs (HR, 0.84; 95% CI, 0.60-1.17,  $p = 0.3$ ), baseline HAM-A score (HR, 1.06; 95% CI, 0.95-1.18,  $p = 0.3$ ), or CES on the duration of remission (HR, 0.86; 95% CI, 0.73-1.02,  $p = 0.085$ ).

### **Baseline Correlates of Long-Term Clinical Score Trajectories**

Significant correlations were observed between higher baseline symptom severity and larger positive residuals, i.e., poorer long-term outcomes (Figure S1; WHODAS:  $\rho = 0.77$ ,  $p < 0.001$ ,  $p_{FDR} < 0.001$ ; CAPS:  $\rho = 0.64$ ,  $p < 0.001$ ,  $p_{FDR} < 0.001$ ; MADRS:  $\rho = 0.64$ ,  $p < 0.001$ ,  $p_{FDR} < 0.001$ ; HAM-A:  $\rho = 0.51$ ,  $p = 0.0039$ ,  $p_{FDR} = 0.012$ ). Lower CES was also significantly correlated with larger positive residuals for disability and depressive symptom outcomes (WHODAS:  $\rho = -0.41$ ,  $p = 0.025$ ,  $p_{FDR} = 0.050$ ; MADRS:  $\rho = -0.44$ ,  $p = 0.016$ ,  $p_{FDR} = 0.039$ ), but not residuals for PTSD and anxiety outcomes (CAPS:  $\rho = -0.22$ ,  $p = 0.24$ ; HAM-A:  $\rho = -0.30$ ,  $p = 0.11$ ). Age was not significantly correlated with residuals ( $p > 0.05$ ).

These findings suggest that individuals with higher severity of disability and psychiatric symptoms before treatment might show less favorable long-term outcomes than those with less severe symptoms at baseline. Individuals with higher symptom severity at baseline might therefore benefit from maintenance treatments after the initial treatment course.

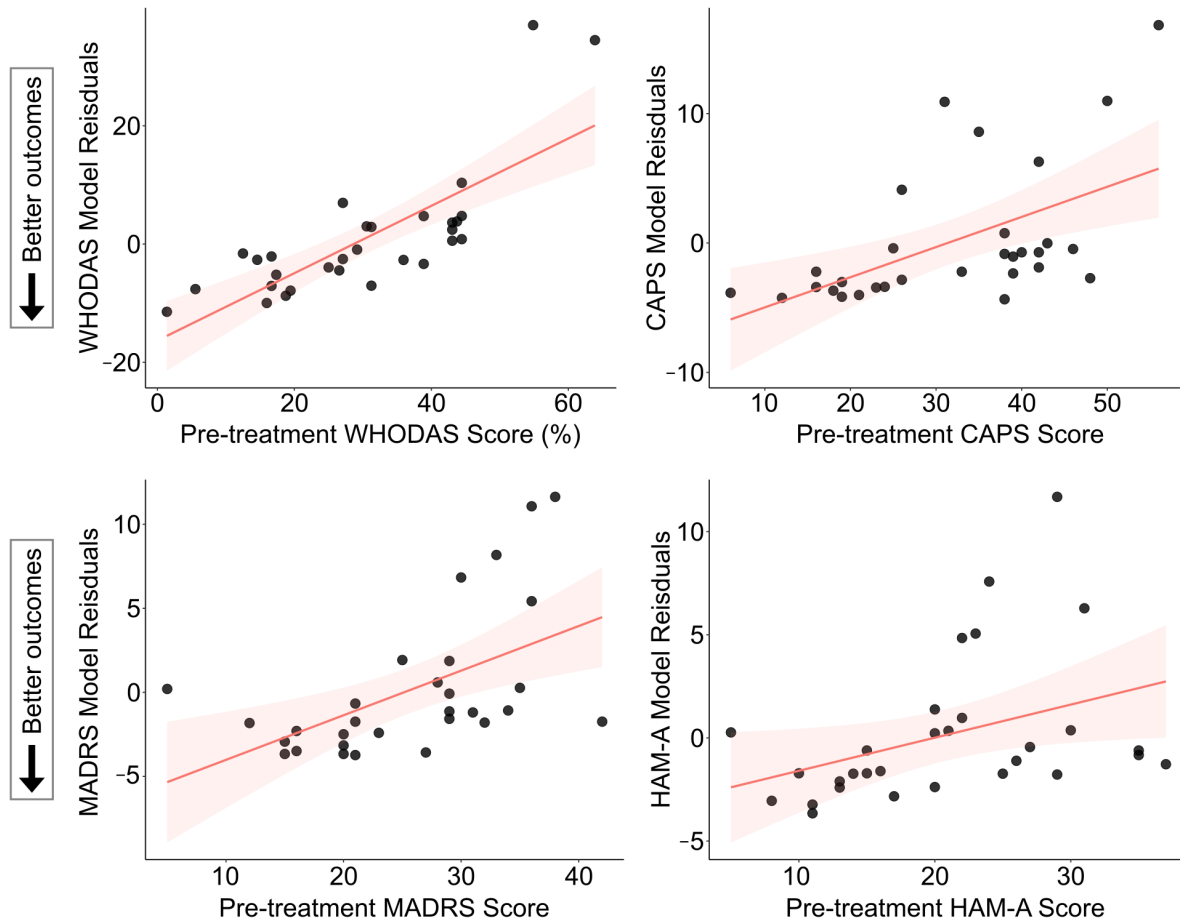

**Figure S1. Associations between higher baseline symptom severity and poorer 12-month symptom trajectories.** Scatterplots show baseline symptom severity and average model residuals for each participant. Larger positive residuals reflect poorer symptom trajectories as compared to the overall group trend from immediately post-MISTIC to the 12-month follow-up. The pink line represents a least squares linear fit with standard error confidence intervals for visualization purposes only.
